# Supplementary material
Source: Elsevier journal article supplement (https://www.sciencedirect.com/science/article/pii/S1888989121001245)
Supplement: mmc1 [file S1888989121001245:mmc1.docx]

**Figure S1.** Flowchart for subject eligibility

PEP Project

N= 588

FEP patients

N= 196

FEP patients

N= 188

FEP patients

N= 158

Genetic data not available

(N= 8 patients)

Executive function data not available (N= 30 patients)

FEP patients

N= 211

Controls

N= 157

Neuroimaging data not available

(N= 124 patients, 88 controls)

Controls

N= 141

Controls

N= 141

Genetics not available

(N=16 controls)

Executive function data not available (N=0 controls)

Controls

N= 165

Time from inclusion to scan > 6 months

(N=8 controls)

Duration from first episode to scan > 18 months

(N= 15 patients)

SSD

N=75

AfP

N=23

OP

N=60

**Abb**: AfP, affective psychosis (12-month follow-up diagnosis of affective psychoses (type I bipolar disorder and major depressive disorder with psychotic symptoms)); FEP, first episode psychosis; OP, other psychosis (12-month follow-up diagnosis of other psychotic disorders (brief reactive psychosis, delusional disorder, substance induced psychotic disorder and psychotic disorder not otherwise specified); SSD, schizophrenia spectrum disorders (12-month follow-up diagnosis of schizophrenia spectrum disorders (schizophrenia, schizophreniform and schizoaffective disorder)).
