# Supplementary material
Source: Elsevier journal article supplement (https://www.sciencedirect.com/science/article/pii/S1888989121001245)
Supplement: mmc2 [file S1888989121001245:mmc2.docx]

|  | Site | COMT Val158Met rs4680 | | Comparison genotype | Diagnose (%) | Comparison Diagnoses | Age, years | Age comparison | Executive function (z score with respect to controls) | EF comparison |
| --- | --- | --- | --- | --- | --- | --- | --- | --- | --- | --- |
| Met/Met | Val carriers | SSD/AfP/OP |
| HC | Barcelona (n=71) | 16 | 55 | X2= 5.32,  p= .378 |  |  | 23.72 | F= 1.57  p=.172 | .13 | F= 1.95  p=.090 |
| Madrid (n=28) | 7 | 21 |  |  | 21.79 | -.14 |
| Zaragoza (n=18) | 1 | 17 |  |  | 22.33 | .11 |
| Vitoria (n=12) | 2 | 10 |  |  | 25.17 | -.02 |
| Asturias (n=8) | 0 | 8 |  |  | 27.50 | .13 |
| Valencia (n=4) | 1 | 3 |  |  | 25.00 | .00 |
| Total (n=141) | 27 | 114 |  |  | 23.53 | .06 |
| FEP | Barcelona (n=82) | 12 | 70 | X2= 5.63  p= .344 | 45.1/ 14.6/40.2 | X2= 18.18  p= .052 | 22.41 | F= 2.91  p=.015a | -.73 | F= 3.12  p=.010b |
| Madrid (n=25) | 5 | 20 | 64/16/20 | 20.56 | -.86 |
| Zaragoza (n=15) | 4 | 11 | 33.3/13.3/53.3 | 22.87 | -1.31 |
| Vitoria (n=18) | 5 | 13 | 38.9/11.1/50.0 | 25.72 | -.38 |
| Asturias (n=13) | 0 | 13 | 69.2/0.0/30.8 | 27.00 | -1.07 |
| Valencia (n=5) | 1 | 4 | 20/60/30 | 23.20 | -.79 |
| Total (n=158) | 27 | 131 | 47.5/14.6/38 | 22.94 | -.80 |

Table S1. COMT genotype, diagnose distribution, mean executive function and age in first episode psychosis (FEP) patients and the healthy controls (HC) group recruited at each site.

a Pos hoc analyses: Asturias > Madrid (p=.023)

b Post hoc analyses: Zaragoza < Vitoria (p=.006).

SSD: 12-month follow-up diagnosis of schizophrenia spectrum disorder (schizophrenia, schizophreniform or schizoaffective disorder). AfP: 12-month follow-up diagnosis of affective psychosis (type I bipolar disorder or major depressive disorder with psychotic symptoms). OP: 12-month follow-up diagnosis of other psychotic disorders (brief reactive psychosis, delusional disorder, substance induced psychotic disorder or psychotic disorder not otherwise specified).
