# Supplementary material
Source: Elsevier journal article supplement (https://www.sciencedirect.com/science/article/pii/S1888989121001245)
Supplement: mmc3 [file S1888989121001245:mmc3.docx]

|  | **HC–Val/Met**  **vs.**  **HC–Val/Val** | | **FEP–Val/Met**  **vs.**  **FEP–Val/Val** | | |
| --- | --- | --- | --- | --- | --- |
| **Dependent variables** | d | p | | d | p | |
| Executive Functions | 0.070 | 0.710 | | -0.090 | 0.610 | |
| Prefrontal Volume | -0.119 | 0.531 | | -0.049 | 0.780 | |
| Left Medial Orbitofrontal Volume | -0.244 | 0.199 | | -0.250 | 0.157 | |
| Left Lateral orbitofrontal Volume | -0.073 | 0.702 | | -0.078 | 0.658 | |
| Right Lateral Orbitofrontal Volume | 0.010 | 0.957 | | -0.096 | 0.585 | |
| Left Superior Frontal Volume | -0.198 | 0.297 | | -0.032 | 0.857 | |
| Right Superior Frontal Volume | -0.069 | 0.716 | | -0.026 | 0.882 | |
| Left Caudal Middle Frontal Volume | 0.072 | 0.702 | | 0.103 | 0.559 | |
| Right Caudal Middle Frontal Volume | -0.301 | 0.114 | | -0.035 | 0.842 | |
| Left Rostral Middle Frontal Volume | -0.019 | 0.920 | | -0.056 | 0.752 | |
| Right Rostral Middle Frontal Volume | -0.002 | 0.993 | | -0.086 | 0.624 | |
| Left Pars Opercularis Volume | -0.188 | 0.321 | | 0.139 | 0.431 | |
| Left Pars Orbitalis Volume | 0.022 | 0.909 | | -0.112 | 0.527 | |
| Left Pars Triangularis Volume | 0.078 | 0.682 | | 0.067 | 0.702 | |
| Right Pars Triangularis Volume | -0.239 | 0.208 | | -0.125 | 0.480 | |

**Table S2** Cohen’s d and p values for the simultaneous effect of diagnosis and COMT Val158Met polymorphism on executive functions, and global and regional prefrontal volume within the healthy controls (HC) and first episode psychosis (FEP) groups.
