# Supplementary material
Source: Elsevier journal article supplement (https://www.sciencedirect.com/science/article/pii/S1888989121001245)
Supplement: mmc4 [file S1888989121001245:mmc4.docx]

| Domains | Neuropsychological test | Test description |
| --- | --- | --- |
| Attention | Controlled Oral Word Association Test, FAS-Test- semantic index Loonstra et al. (2001) | To generate as many words as possible beginning with F, A and S in three separate trials of 60 seconds. Measure: sum of all correct responses. |
| Test Barcelona, Animal Words  Peña-Casanova (1990) | To produce as many animal names as possible in a 60 seconds interval. Measure: number of correct responses. |
| Trail Making Test (TMT) form A Reitan and Wolfson  (1993) | To draw lines connecting numbers according to increasing sequence. Measure: time to complete test. |
| Working memory | Trail Making Test (TMT) –form B Reitan and Wolfson  (1993) | To draw lines connecting characters sequentially alternating between numbers and letters. Measure:  time to complete test. |
| Mental flexibility | WCST- percentage of perseverative errors index  Heaton et al. (1993) | To complete a complex task of categorization set shifting, and to respond to feedback from the examiner. Measure: perseverative errors. |
| Response inhibition | WCST- total errors index | For test description see previously describe WCST in this table. Measure: total errors. |
| Trail Making Test (TMT) -B/A index | For test description see previously describe TMT-A and TMT-B in this table. Measure: B/A ratio (time to complete form B divided by time to complete form A). |
| Stroop Test Golden (1978) | To name the color in which the color names are printed and disregard their verbal content. Measure: Interference Index (Words Color – Words x Color /Words+ Color). |
| Problem solving | WCST- categories | For test description see previously describe WCST in this table. Measure: number of completed categories. |
| WCST-percentage conceptual level responses | For test description see previously describe WCST in this table. Measure: percentage of conceptual responses. |

Table S3. Executive function domains and neuropsychological tests description.

WCST: Wisconsin Card Sorting Test.

Note: The TMT indexes (both the TMT-B and TMT B/A) (Reitan and Wolfson 2004) have a reliability in clinical groups ranging from 0.69 to 0.94 for part A and from 0.66 to 0.86 for part B (Goldstein 1989), the Wisconsin Card Sorting Test (WCST) has a generalizability in the different component variables ranging from 0.52 to 0.71 (Heaton 2001); and Stroop Color-Word Test (Golden 1975) with a reliability proven to be very consistent, ranging from 0.73 to 0.86 (Golden 1994)
