# Supplementary material
Source: Elsevier journal article supplement (https://www.sciencedirect.com/science/article/pii/S1888989121001245)
Supplement: mmc6 [file S1888989121001245:mmc6.doc]

|  | **FEP (n=158)** | **HC (n=141)** |  |
| --- | --- | --- | --- |
| **Categorical Variables** | Frequency (percentage) | Frequency (percentage) | **Statistical tests** |
| Sex | Males=108 (68%) | Males=86 (61%) | χ²=1.77 (p=.18) |
| Ethnicity a | Caucasian=139 (88%) | Caucasian=126 (89%) | χ²=0.14, p=.71 |
| Handedness b | RH=136 (86%); LH=17 (11%) | RH=126 (88%); LH=12 (9%) | χ²=0.78 (p=.68) |
| Socioeconomic Status c | (1)=86 (54%) | (1)=104 (74%) | χ²=11.78 (p=.001) |
| Diagnosis d | SSD=75(48%); AfP=23(15%) | --- | --- |
| COMT Val158Met e | Met-Met=27 (17%) | Met-Met=27 (19%) | χ2=0.21 (p=0.64) |
| **Quantitative Variables** | Mean (SD) [range] | Mean (SD) [range] | **Statistical tests** |
| Age (years) | 22.94 (5.85) [9-35] | 23.66 (5.90) [9-35] | t=0.83 (p=.41) |
| Estimated IQ | 92.85(15.93) [60-140] | 107.84 (14.10) [75-145] | t=-8.57 (p<.0005) |
| PAS infancy | 5.97 (3.91) [0-21] | 3.94 (2.74) [0-12] | t=6.20 (p<.0005) |
| Antipsychotic dose f | 45539 (70369) [0-599300] | --- | --- |
| PANSS g positive | 17.14 (8.08) [7-41] | --- | --- |
| PANSS g negative | 18.32 (8.74) [7-42] | --- | --- |
| PANSS g total | 71.17 (25.55) [30-158] | --- | --- |

**Table S5.** Demographic and clinical characteristics of the first episode psychosis (FEP) patients and the healthy controls (HC) group.

a (1) Caucasians; (2) Others

b (1) RH=Right-handed; (2) LH=Left-handed; (3) Mixed

c (1) Intermediate-Low and Low; (2) High, Intermediate-High and Intermediate

d (1) Schizophrenia spectrum disorder (SSD); (2) Affective psychosis (AfP); (3) Other psychosis (Ops)

e (1) Met-Met; (2) Val-carriers

f Cumulative antipsychotic dose at scan in chlorpromazine equivalents

g PANSS=Spanish version of the positive and negative symptom scale (PANSS) [Kay, Fiszbein et al. 1987]. Reported scores were obtained at baseline.
