# Supplementary material
Source: Elsevier journal article supplement (https://www.sciencedirect.com/science/article/pii/S1888989121001245)
Supplement: mmc7 [file S1888989121001245:mmc7.doc]

|  | **Met-Met (n=54)** | | | **Val-Carriers (n=245)** | | | |
| --- | --- | --- | --- | --- | --- | --- | --- |
|  | Frequency (percentage) | | | Frequency (percentage) | | | |
| **Categorical Variables** | **HC (n=27)** | **FEP (n=27)** | **Statistical Tests** | **HC (n=114)** | **FEP (n=131)** | **Statistical Tests** | |
| Sex | Males=14 (52%) | Males=15 (56%) | χ²=.74 (p=.79) | Males=72 (63%) | Males=93 (71%) | χ²=1.70 (p=.19) | |
| Ethnicity a | Caucasian=25 (93%) | Caucasian=25 (93%) | χ²=0 (p=1) | Caucasian=101 (89%) | Caucasian=114 (87%) | χ²=.14, p=.71 | |
| Handedness b | RH=23 (86%); LH=2 (7%) | RH=24 (89%); LH=3 (11%) | χ²=2.22 (p=.33) | RH=103 (90%); LH=7 (9%) | RH=112 (86%); LH=14 (11%) | χ²=2.54 (p=.28) | |
| Socioeconomic Status c | (1)=20 (74%) | (1)=20 (74%) | χ²=0 (p=1) | (1)=84 (74%) | (1)=66 (50%) | χ²=13.73 (p<.0005) | |
| Diagnosis d | --- | SSD=11 (41%); AfP=4 (15%) | --- | --- | SSD=64 (49%); AfP=19 (15%) | --- | |
|  | Mean (SD) | | | Mean (SD) | | | |
| **Quantitative Variables** | **HC (n=27)** | **FEP (n=27)** | **Statistical Tests** | **HC (n=114)** | **FEP (n=131)** | | **Statistical Tests** |
| Age (years) | 21.89 (6.05) | 23.33 (6.29) | t=.86 (p=.39) | 23.92 (5.99) | 22.86 (6.14) | | t=1.36 (p=.18) |
| Estimated IQ | 107.59 (13.11) | 95.00 (16.05) | t=3.16 (p=.003) | 107.90 (14.37) | 92.41 (15.93) | | t=7.94 (p<.0005) |
| PAS infancy | 3.00 (2.32) | 5.11 (3.12) | t=2.82 (p=.007) | 3.61 (2.84) | 6.15 (4.05) | | t=5.67 (p<.0005) |
| Antipsychotic dose e | --- | 46473.62 (46009.11) | --- | --- | 45344.92 (74605.61) | | --- |
| PANSS f positive | --- | 16.85 (9.03) | --- | --- | 17.20 (7.91) | | --- |
| PANSS f negative | --- | 17.41 (9.44) | --- | --- | 18.51 (8.62) | | --- |
| PANSS f total | --- | 69.70 (26.27) | --- | --- | 71.47 (25.49) | | --- |

**Table S6.** Demographic and clinical characteristics of the COMT Val158Met polymorphism variants, divided by diagnostic status [first episode psychosis (FEP) patients and the healthy controls (HC) group].

a (1) Caucasians; (2) Others

b (1) RH=Right-handed; (2) LH=Left-handed; (3) Mixed

c (1) Intermediate-Low and Low; (2) High, Intermediate-High and Intermediate

d (1) Schizophrenia spectrum disorder (SSD); (2) Affective psychosis (AfP); (3) Other psychosis (Ops)

e Cumulative antipsychotic dose at scan in chlorpromazine equivalents

f PANSS=Spanish version of the positive and negative symptom scale (PANSS) [Kay, Fiszbein et al. 1987]. Reported scores were obtained at baseline.
