# Supplementary material
Source: Elsevier journal article supplement (https://www.sciencedirect.com/science/article/pii/S1888989121001245)
Supplement: mmc9 [file S1888989121001245:mmc9.doc]

**Table S8.** Cohen’s d and p values for the simultaneous effect of diagnosis and COMT Val158Met polymorphism on global and regional prefrontal volume.

|  | **HC–Met/Met**  **vs.**  **HC–Val carriers** | | **HC–Met/Met**  **vs.**  **FEP–Met/Met** | | **HC–Met/Met**  **vs.**  **FEP–Val carriers** | | | **HC–Val carriers**  **vs.**  **FEP–Met/Met** | | | **HC– Val carriers**  **vs.**  **FEP–Val carriers** | | | | **FEP–Met/Met**  **vs.**  **FEP–Val carriers** | |
| --- | --- | --- | --- | --- | --- | --- | --- | --- | --- | --- | --- | --- | --- | --- | --- | --- |
| **Dependent variables** | d | p | d | p | | d | p | | d | p | | d | p | d | | p |
| Prefrontal Volume | 0.063 | 0.711 | 0.211 | 0.450 | | 0.322 | 0.046 | | 0.091 | 0.592 | | 0.356 | 0.006 | 0.185 | | 0.249 |
| Left Medial Orbitofrontal Volume | 0.065 | 0.703 | 0.174 | 0.534 | | 0.332 | 0.040 | | 0.067 | 0.694 | | 0.359 | 0.006 | 0.210 | | 0.191 |
| Left Lateral orbitofrontal Volume | -0.027 | 0.874 | 0.051 | 0.855 | | 0.111 | 0.488 | | 0.068 | 0.690 | | 0.184 | 0.153 | 0.077 | | 0.632 |
| Right Lateral Orbitofrontal Volume | -0.176 | 0.301 | -0.270 | 0.334 | | 0.048 | 0.764 | | -0.059 | 0.731 | | 0.292 | 0.024 | 0.266 | | 0.099 |
| Left Superior Frontal Volume | 0.128 | 0.450 | 0.427 | 0.129 | | 0.355 | 0.028 | | 0.181 | 0.288 | | 0.317 | 0.014 | 0.076 | | 0.637 |
| Right Superior Frontal Volume | 0.157 | 0.357 | 0.256 | 0.360 | | 0.417 | 0.010 | | 0.047 | 0.780 | | 0.359 | 0.006 | 0.226 | | 0.161 |
| Left Caudal Middle Frontal Volume | -0.073 | 0.666 | -0.110 | 0.694 | | 0.167 | 0.299 | | -0.007 | 0.966 | | 0.312 | 0.016 | 0.242 | | 0.132 |
| Right Caudal Middle Frontal Volume | 0.082 | 0.631 | 0.142 | 0.612 | | 0.342 | 0.034 | | 0.025 | 0.884 | | 0.356 | 0.006 | 0.244 | | 0.130 |
| Left Rostral Middle Frontal Volume | 0.087 | 0.607 | 0.282 | 0.315 | | 0.331 | 0.040 | | 0.090 | 0.596 | | 0.314 | 0.015 | 0.159 | | 0.323 |
| Right Rostral Middle Frontal Volume | -0.014 | 0.934 | 0.159 | 0.568 | | 0.148 | 0.357 | | 0.131 | 0.442 | | 0.212 | 0.100 | 0.038 | | 0.812 |
| Left Pars Opercularis Volume | -0.004 | 0.979 | 0.074 | 0.791 | | 0.117 | 0.465 | | 0.061 | 0.722 | | 0.164 | 0.203 | 0.068 | | 0.671 |
| Left Pars Orbitalis Volume | 0.169 | 0.321 | 0.174 | 0.533 | | 0.233 | 0.148 | | -0.038 | 0.825 | | 0.100 | 0.435 | 0.111 | | 0.488 |
| Left Pars Triangularis Volume | 0.027 | 0.876 | 0.073 | 0.795 | | 0.098 | 0.540 | | 0.033 | 0.845 | | 0.106 | 0.411 | 0.049 | | 0.759 |
| Right Pars Triangularis Volume | -0.077 | 0.652 | -0.222 | 0.426 | | 0.032 | 0.843 | | -0.073 | 0.667 | | 0.138 | 0.283 | 0.183 | | 0.256 |
