# Supplementary material
Source: Elsevier journal article supplement (https://www.sciencedirect.com/science/article/pii/S1888989121001245)
Supplement: mmc11 [file S1888989121001245:mmc11.doc]

**Table S10** Pearson’s r and p values for the relationship between executive functions and regional prefrontal volume.

|  |  | |
| --- | --- | --- |
| **Regions** | r | p |
| Prefrontal Volume | .262 | .000006 |
| Left Medial Orbitofrontal Volume | .155 | .007 |
| Left Lateral orbitofrontal Volume | .182 | .002 |
| Right Lateral Orbitofrontal Volume | .167 | .004 |
| Left Superior Frontal Volume | .282 | <.0005 |
| Right Superior Frontal Volume | .277 | <.0005 |
| Left Caudal Middle Frontal Volume | .230 | <.0005 |
| Right Caudal Middle Frontal Volume | .250 | <.0005 |
| Left Rostral Middle Frontal Volume | .222 | <.0005 |
| Right Rostral Middle Frontal Volume | .120 | .038 |
| Left Pars Opercularis Volume | .141 | .015 |
| Left Pars Orbitalis Volume | .123 | .034 |
| Left Pars Triangularis Volume | .065 | .260 |
| Right Pars Triangularis Volume | .056 | .337 |
